# Supplementary material for: Changes of Gut Microbiota by Natural mtDNA Variant Differences Augment Susceptibility to Metabolic Disease and Ageing
Source: MDPI journal article supplement (doi:10.3390/ijms23031056), 2022-01-19
Supplement: s1 [file s1]

## Supplementary Materials

**Table S1. The list of mouse samples used in the gut microbiota analysis.**

| Week 0                        |      |        | Week 8 |        |      |        |
|-------------------------------|------|--------|--------|--------|------|--------|
| (Before Dietary Intervention) |      |        | CD     |        | HFD  |        |
| Strain                        | Male | Female | Male   | Female | Male | Female |
| B6-mt <sup>ALR</sup>          | 8    | 11     | 3      | 3      | 5    | 8      |
| B6-mt <sup>BPL</sup>          | 8    | 11     | 3      | 3      | 5    | 8      |

**Table S2. The list of KEGG pathways involved in differently abundant bacteria between B6-mt<sup>BPL</sup> and B6-mt<sup>ALR</sup> mice.**

Separate excel file.

**Table S3. The list of mutations in the mtDNA in B6-mt<sup>BPL</sup> and B6-mt<sup>ALR</sup> mice.**

|                                      |               |               |
|--------------------------------------|---------------|---------------|
| Position *                           | 4738          | 11,902        |
| Strain Gene                          | <i>mt-Nd2</i> | <i>mt-Nd5</i> |
| <i>C57BL/6J-mt<sup>BPL/1J</sup></i>  | C             | C             |
| <i>C57BL/6J-mt<sup>ALR/L1J</sup></i> | A             | T             |
| AA change                            | Leu-Met       | Phe-Leu       |

\* Each mutation is unique for respective conplastic mouse strain, and not observed in other mouse strains to date.

**Figure S1**

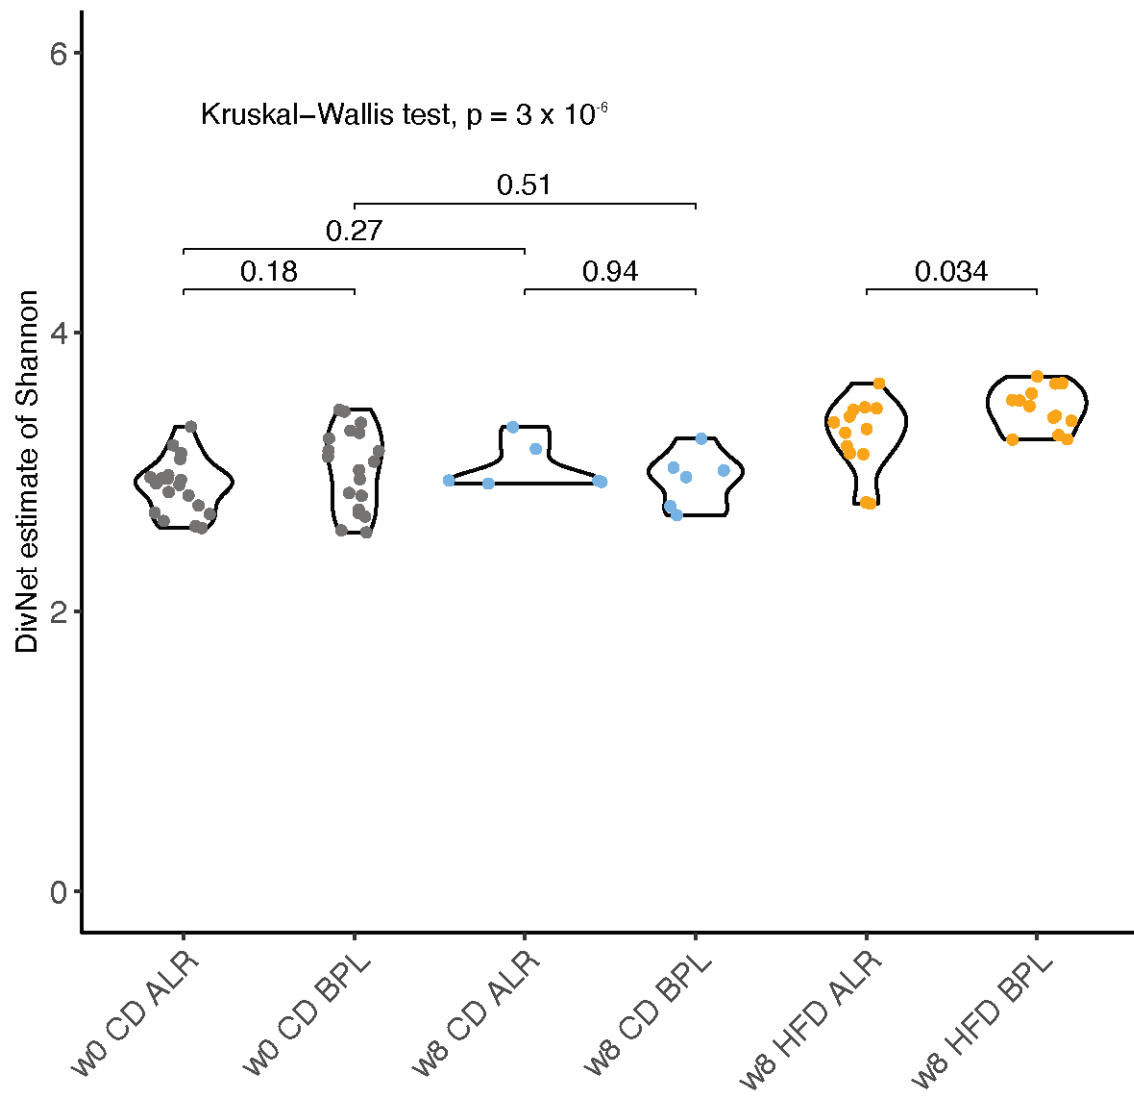

**Figure S1: Data related to Figure 1.** Alpha diversity plot depicting an estimate of Shannon.

w0: week 0, w8: week 8, CD: control diet, HFD: high-fat diet, ALR: B6-mt<sup>ALR</sup>, BPL: B6-mt<sup>BPL</sup>.

**Figure S2**

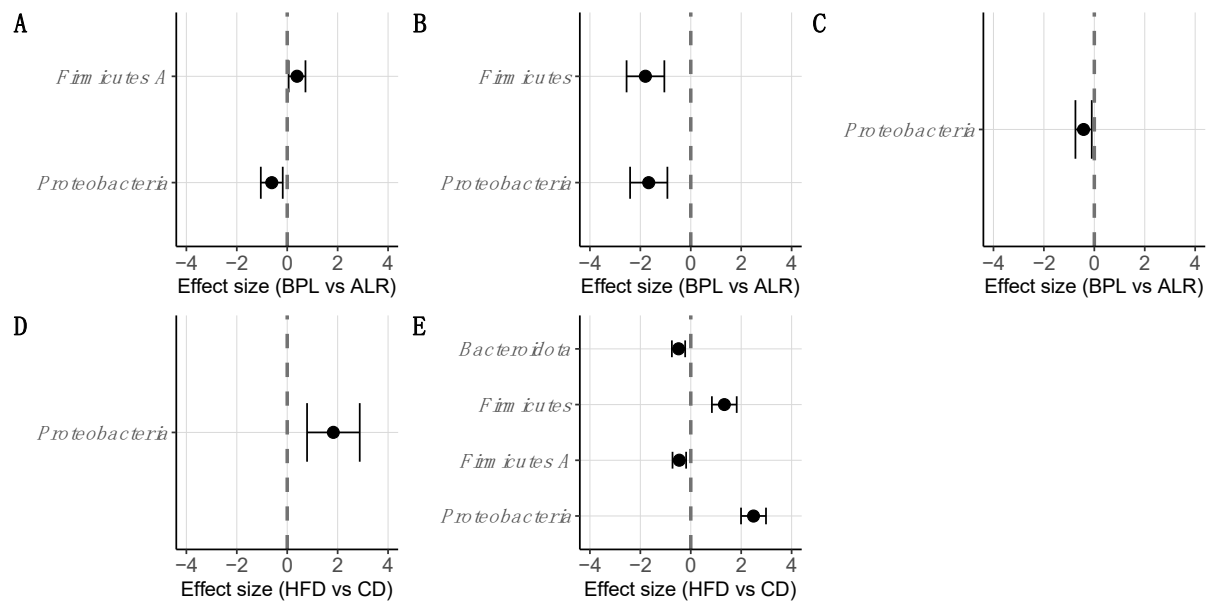

**Figure S2: Data related to Figure 2.** Bacterial phyla, which were significantly differentially abundant between B6-mt<sup>BPL</sup> and B6-mt<sup>ALR</sup> before dietary intervention (week 0; **(A)**), at 8 weeks after CD feeding **(B)**, and at 8 weeks after HFD feeding **(C)** are presented. Similarly, those between HFD-fed group and CD-fed group in B6-mt<sup>ALR</sup> mice **(D)** and in B6-mt<sup>BPL</sup> mice **(E)** are shown.

Figure S3

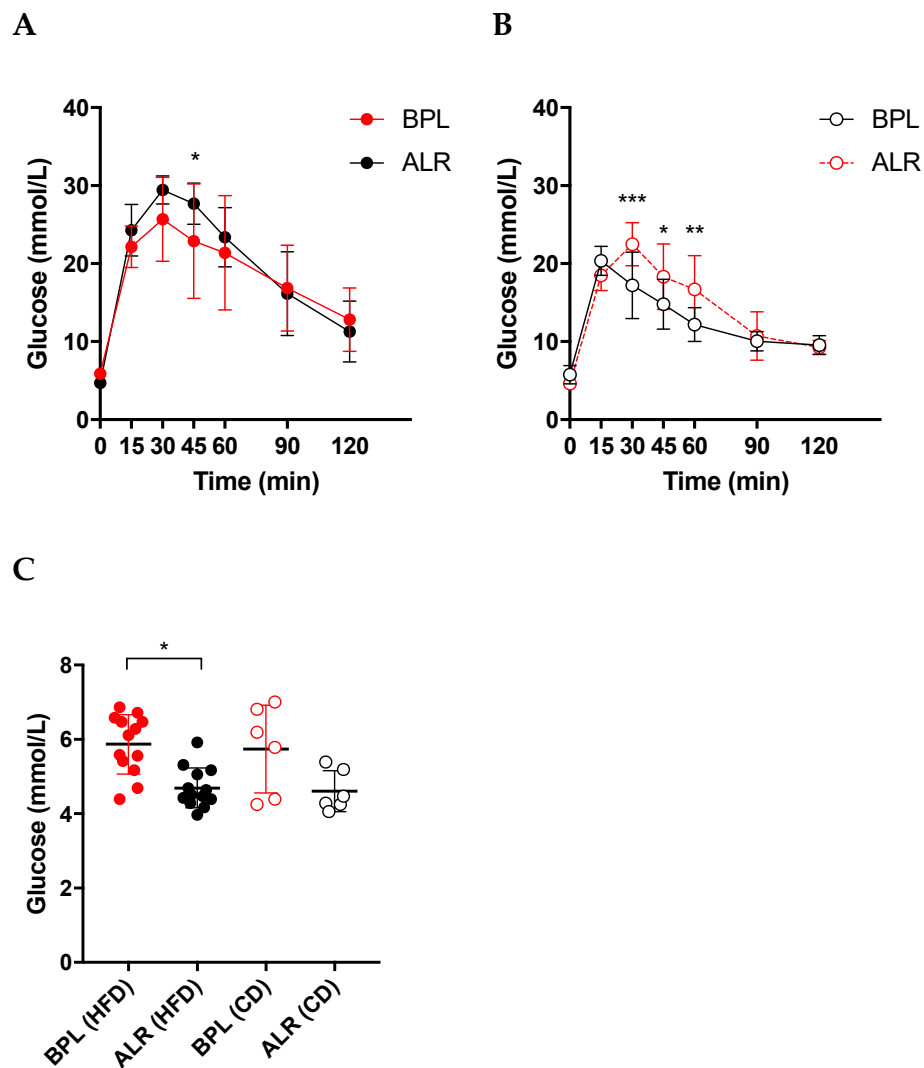

**Figure S3: Metabolic phenotype observed in B6-mt<sup>BPL</sup> and B6-mt<sup>ALR</sup> mice published in reference 16.** (A). ipGTT test conducted in HFD-fed mice. BPL = B6-mt<sup>BPL</sup>, ALR = B6-mt<sup>ALR</sup>, n = 13 (5 males and 8 females)/strain. \*  $p = 0.0411$ , two-way ANOVA. (B). ipGTT test in CD-fed mice. N = 6 (3 males and 3 females)/strain. \*  $p = 0.0223$ , \*\*  $p = 0.0022$ , \*\*\*  $p = 0.0003$ , two-way ANOVA. (C). Fasting glucose levels taken in (A,B). \*  $p = 0.0120$ , Kruskal-Wallis test. All data is consisted with males and females.
